# Supplementary material
Source: MDPI journal article supplement (https://www.mdpi.com/1999-4907/10/9/736)
Supplement: s1 [file s1]

Archive with 2 entries (2 files):
- Supplemental Figure 1.pdf
- Supplemental Tables 1 to 6.pdf
