# Supplementary material
Source: MDPI journal article supplement (https://www.mdpi.com/1999-4907/10/9/736)
Supplement: s1 [file s1 › Supplemental Figure 1.pdf]

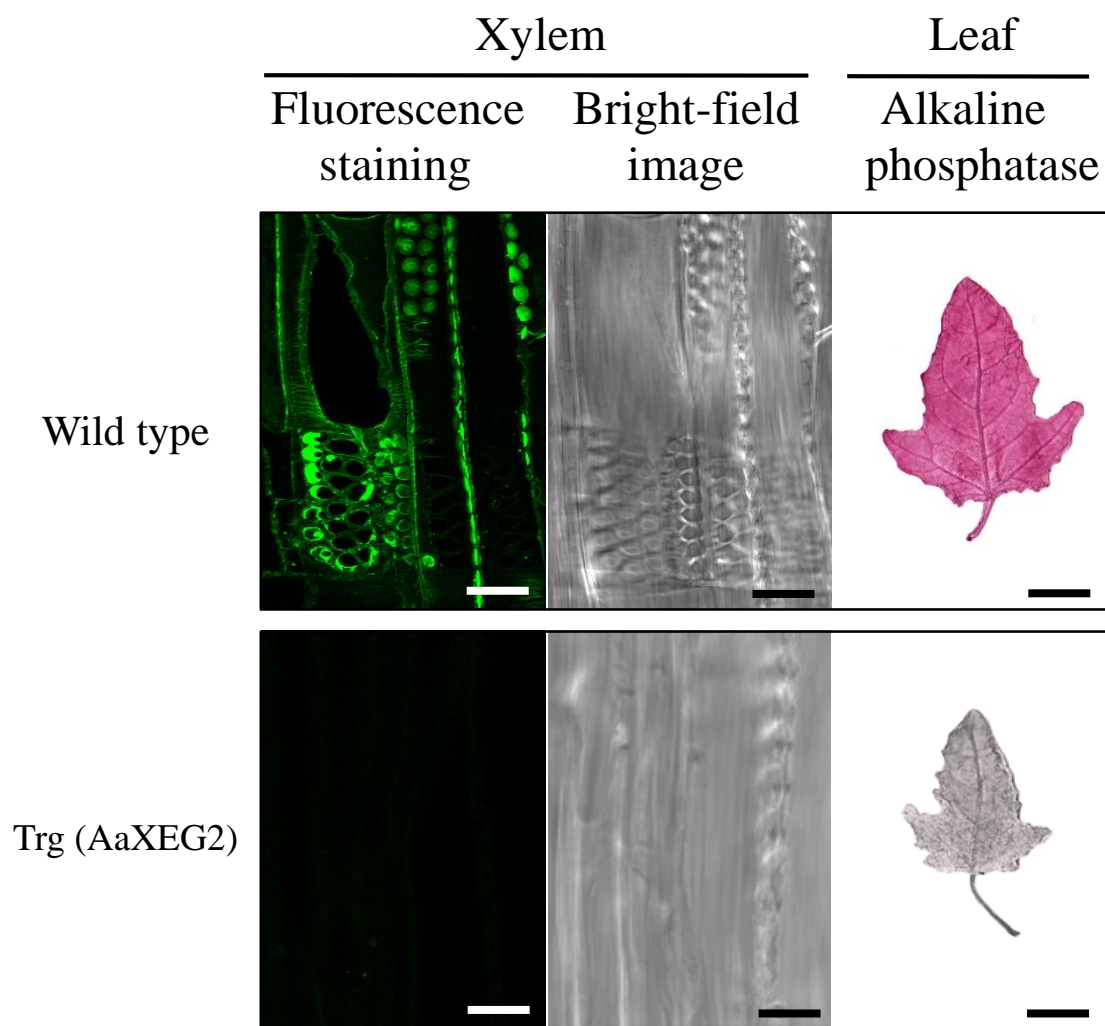

**Figure S1.** Immuno-staining images of longitudinal section of poplar xylem (left) together with a bright-field image (middle) and whole leaf (right) with the anti-xyloglucan antibody CCRC-M1. Trg (AaXEG2), transgenic poplar overexpressing xyloglucanase. Bars = 50  $\mu$ m for xylem and 2 cm for leaf.
